# Supplementary material for: Enrofloxacin Shifts Intestinal Microbiota and Metabolic Profiling and Hinders Recovery from Salmonella enterica subsp. enterica Serovar Typhimurium Infection in Neonatal Chickens
Source: PubMed Central journal article supplement (PMC7485687; doi:10.1128/msphere.00725-20), 2020-09-09

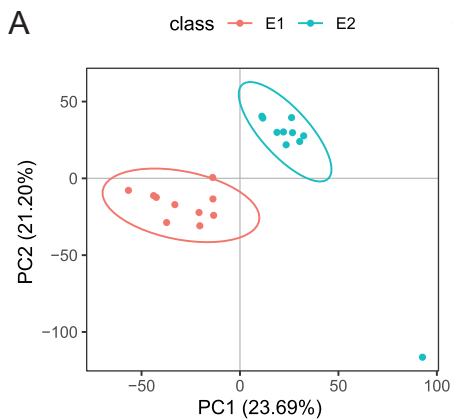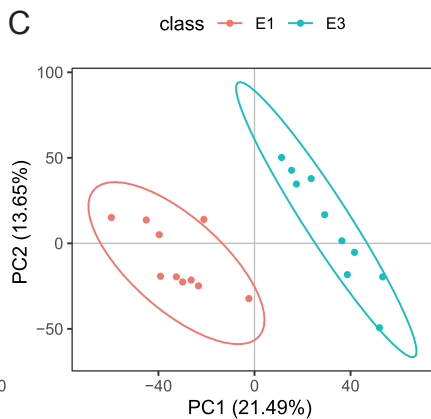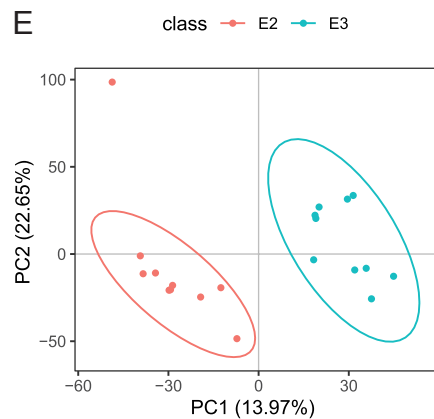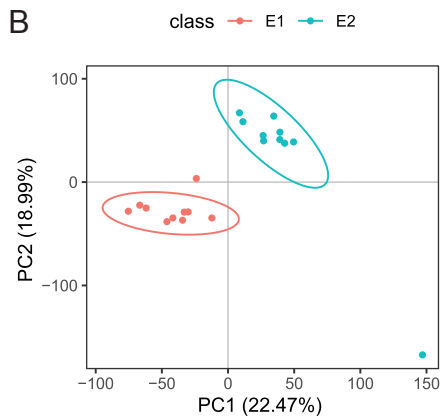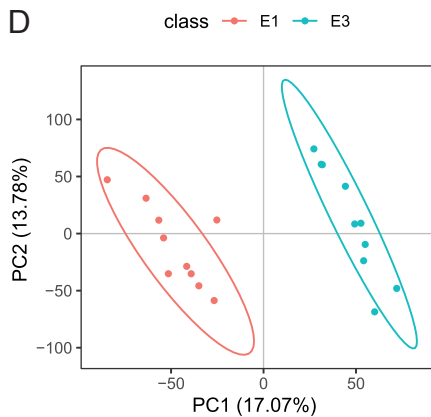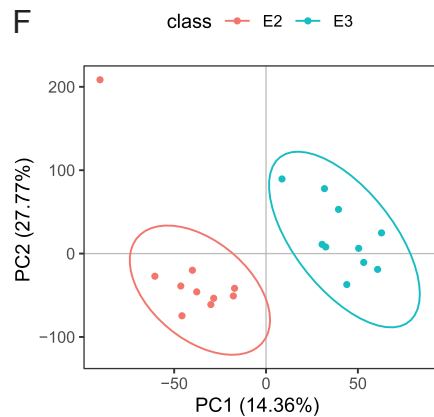

Supplement: mSphere.00725-20-sf001.pdf [file mSphere.00725-20-sf001.pdf]
