# Supplementary material for: Enrofloxacin Shifts Intestinal Microbiota and Metabolic Profiling and Hinders Recovery from Salmonella enterica subsp. enterica Serovar Typhimurium Infection in Neonatal Chickens
Source: PubMed Central journal article supplement (PMC7485687; doi:10.1128/msphere.00725-20), 2020-09-09
Supplement: mSphere.00725-20-st001.pdf [file mSphere.00725-20-st001.pdf]

**Table S1**

| <b>Taxa</b>     | <b>Groups</b> |            |            |             |             |             |             |             |             |
|-----------------|---------------|------------|------------|-------------|-------------|-------------|-------------|-------------|-------------|
|                 | <b>7E1</b>    | <b>7E2</b> | <b>7E3</b> | <b>14E1</b> | <b>14E2</b> | <b>14E3</b> | <b>21E1</b> | <b>21E2</b> | <b>21E3</b> |
| Verrucomicrobia | 0             | 0          | 0          | 4.94E-06    | 2.16E-05    | 2.53E-06    | 0           | 0           | 7.31E-06    |
| Thermi          | 4.88E-06      | 1.97E-05   | 4.32E-05   | 0           | 0           | 0           | 0           | 0           | 0           |
| Actinobacteria  | 2.20E-05      | 2.47E-06   | 4.56E-05   | 0.000699    | 0.001409    | 0.000169    | 0.000206    | 0.000189    | 0.000193    |
| Tenericutes     | 0             | 0          | 0          | 0.000215    | 0.002341    | 0.002508    | 0.001622    | 0.007415    | 0.003503    |
| Cyanobacteria   | 9.76E-06      | 7.40E-06   | 9.61E-06   | 2.47E-05    | 0.001692    | 0.003699    | 0.000861    | 0.012317    | 0.010128    |
| Proteobacteria  | 0.073029      | 0.065214   | 0.063566   | 0.121165    | 0.013446    | 0.027343    | 0.002524    | 0.011835    | 0.012907    |
| Bacteroidetes   | 0.00021       | 5.67E-05   | 0.000142   | 3.70E-05    | 0.295526    | 0.017371    | 0.412781    | 0.364313    | 0.420906    |
| Firmicutes      | 0.926724      | 0.9347     | 0.936194   | 0.877855    | 0.685564    | 0.948906    | 0.582005    | 0.60393     | 0.552356    |
