# Supplementary material for: Enrofloxacin Shifts Intestinal Microbiota and Metabolic Profiling and Hinders Recovery from Salmonella enterica subsp. enterica Serovar Typhimurium Infection in Neonatal Chickens
Source: PubMed Central journal article supplement (PMC7485687; doi:10.1128/msphere.00725-20), 2020-09-09
Supplement: mSphere.00725-20-st002.pdf [file mSphere.00725-20-st002.pdf]

**Table S2**

| <b>Taxa</b>           | <b>Groups</b> |            |            |             |             |             |             |             |             |
|-----------------------|---------------|------------|------------|-------------|-------------|-------------|-------------|-------------|-------------|
|                       | <b>7E1</b>    | <b>7E2</b> | <b>7E3</b> | <b>14E1</b> | <b>14E2</b> | <b>14E3</b> | <b>21E1</b> | <b>21E2</b> | <b>21E3</b> |
| <i>Blautia</i>        | 0.0086        | 0.008677   | 0.007694   | 0.008083    | 0.005315    | 0.004526    | 0.003507    | 0.01096     | 0.003232    |
| <i>Anaerotruncus</i>  | 0.053596      | 0.006568   | 0.005869   | 0.005035    | 0.00498     | 0.009032    | 0.003572    | 0.002186    | 0.001475    |
| <i>Butyricicoccus</i> | 0.018525      | 0.039124   | 0.031825   | 0.012376    | 0.009924    | 0.027556    | 0.004913    | 0.002793    | 0.00282     |
| <i>Coprococcus</i>    | 0.00061       | 0.005608   | 0.014108   | 0.009404    | 0.009873    | 0.007727    | 0.016694    | 0.025795    | 0.013953    |
| <i>Dorea</i>          | 0.02435       | 0.027667   | 0.014975   | 0.013642    | 0.011429    | 0.01704     | 0.004239    | 0.01293     | 0.006321    |
| <i>Clostridium</i>    | 0.039958      | 0.066906   | 0.071992   | 0.030218    | 0.020434    | 0.026701    | 0.00648     | 0.011062    | 0.005355    |
| <i>Escherichia</i>    | 0.044337      | 0.043481   | 0.04594    | 0.120792    | 0.013298    | 0.02706     | 0.002471    | 0.01167     | 0.012849    |
| <i>Lactobacillus</i>  | 0.008297      | 0.012528   | 0.008847   | 0.008733    | 0.044324    | 0.11483     | 0.197679    | 0.131528    | 0.26228     |
| <i>Oscillospira</i>   | 0.23907       | 0.215051   | 0.171717   | 0.070295    | 0.034772    | 0.08137     | 0.043218    | 0.048907    | 0.032091    |
| <i>Ruminococcus</i>   | 0.216861      | 0.164213   | 0.180617   | 0.159861    | 0.128676    | 0.109191    | 0.083451    | 0.07457     | 0.037337    |
| <i>Bacteroides</i>    | 0.00021       | 5.67E-05   | 0.000142   | 2.72E-05    | 0.29548     | 0.017368    | 0.412781    | 0.364296    | 0.420901    |
| <i>Other</i>          | 0.345586      | 0.410121   | 0.446275   | 0.561534    | 0.421496    | 0.557598    | 0.220997    | 0.303303    | 0.201387    |
